# Supplementary material
Source: PubMed Central journal article supplement (PMC4340564)
Supplement: NIHMS62209-supplement-01.pdf [file NIHMS62209-supplement-01.pdf]

**Supplementary TABLE 1 Factor loadings of PCA derived dietary patterns in full sample (n=2501) as well as random split sample (n=1242)**

|                              | Factor 1<br>Full | <i>Split</i> | Factor 2<br>Full | <i>Split</i> | Factor 3<br>Full | <i>Split</i> |
|------------------------------|------------------|--------------|------------------|--------------|------------------|--------------|
| spirits, liqueur, alcopops   | -14              | -9           | -6               | -18          | <b>-33</b>       | -33          |
| beers and ciders             | 1                | -1           | -11              | -14          | <b>-27</b>       | -27          |
| wines                        | 7                | 10           | -1               | -43          | <b>-53</b>       | -30          |
| biscuits and cakes           | 6                | 9            | <b>-29</b>       | 42           | 38               | -2           |
| butters and animal fat       | -1               | -3           | <b>-31</b>       | 20           | 4                | -27          |
| cereal based mixed meals     | 13               | 14           | -24              | 10           | -4               | -12          |
| cheeses                      | <b>40</b>        | 44           | -3               | -1           | -10              | -2           |
| chocolate and confectionery  | 9                | 14           | <b>-30</b>       | 45           | 35               | -11          |
| condiments                   | -5               | 5            | 1                | 24           | <b>26</b>        | 10           |
| crisps and savoury snacks    | <b>26</b>        | 33           | 5                | 6            | 1                | 4            |
| eggs                         | 4                | 6            | <b>-31</b>       | 17           | 3                | -24          |
| fish                         | -16              | -14          | 18               | -17          | -10              | 8            |
| fresh fruit                  | <b>27</b>        | 26           | <b>55</b>        | -11          | 22               | 56           |
| fruit and vegetable juices   | 16               | 14           | 11               | -20          | -14              | 7            |
| game and offal               | -14              | -19          | 9                | -9           | 1                | 9            |
| high fat milk and cream      | -14              | -8           | -7               | 30           | 33               | 13           |
| high fibre bread             | 15               | 3            | <b>46</b>        | -24          | 8                | 48           |
| high fibre breakfast cereals | 6                | 3            | <b>26</b>        | 8            | 31               | 39           |
| hot and powdered drinks      | -3               | 0            | -18              | 24           | 23               | -3           |
| ice cream                    | 4                | 0            | -13              | 20           | 14               | 2            |
| infant nutrition             | 3                | 0            | 1                | 0            | 3                | 0            |
| legumes                      | <b>50</b>        | 49           | -4               | 11           | 13               | 5            |
| low fat milk                 | <b>42</b>        | 38           | 3                | 7            | 10               | 9            |
| low fibre bread              | -4               | 7            | <b>-58</b>       | 46           | 11               | -45          |
| margarine and vegetable oils | 8                | 9            | 2                | 19           | 22               | 23           |
| miscellaneous                | -1               | 3            | -12              | -7           | -17              | -23          |
| nuts and seeds               | <b>39</b>        | 44           | 15               | -1           | 5                | 17           |
| other bread                  | 18               | 17           | -11              | -10          | -22              | -22          |
| other breakfast cereals      | 0                | 0            | -12              | 9            | 0                | -11          |
| other fruit                  | <b>32</b>        | 33           | 12               | -3           | 7                | 12           |
| potatoes                     | <b>-25</b>       | -21          | -22              | 48           | <b>35</b>        | -9           |
| poultry                      | <b>-31</b>       | -19          | 21               | -25          | -20              | -6           |
| puddings                     | -7               | -8           | -11              | 31           | <b>35</b>        | 16           |
| red meat                     | <b>-45</b>       | -47          | -13              | 5            | -1               | -16          |
| rice, pasta and other grains | <b>41</b>        | 43           | 5                | -34          | -34              | -13          |
| sauces                       | <b>25</b>        | 34           | 0                | -4           | -11              | -7           |
| soft drinks and squashes     | -9               | 0            | -3               | -1           | -15              | -21          |
| soups                        | 9                | 2            | 12               | -18          | -13              | 4            |
| vegetable mixed dishes       | <b>51</b>        | 47           | -1               | -28          | -28              | -14          |
| vegetables, raw and boiled   | 13               | 20           | 43               | 1            | 24               | 42           |
| water                        | 22               | 28           | 32               | -16          | -1               | 20           |
| yogurts                      | 15               | 20           | 35               | -18          | 2                | 26           |

Factors loadings  $>25$  and non-overlapping are indicated in **bold**

Supplementary TABLE 2 Factor loadings of the first RRR derived dietary pattern in the full sample (n=2501) as well as random split sample (n=1242)

|                              | Full sample  | Split sample |
|------------------------------|--------------|--------------|
| wines                        | <b>0.739</b> | <b>0.716</b> |
| spirits, liqueur, alcopops   | <b>0.469</b> | <b>0.451</b> |
| beers and ciders             | <b>0.311</b> | <b>0.280</b> |
| rice, pasta, other grains    | 0.124        | 0.129        |
| poultry                      | 0.090        | 0.073        |
| fruit and vegetable juice    | 0.089        | 0.052        |
| soft drinks and squashes     | 0.087        | 0.078        |
| cheeses                      | 0.078        | 0.125        |
| fish                         | 0.064        | 0.093        |
| vegetable mixed dishes       | 0.063        | 0.068        |
| sauces                       | 0.063        | 0.102        |
| red meat                     | 0.051        | 0.058        |
| soups                        | 0.044        | 0.026        |
| cereal based mixed meals     | 0.036        | 0.026        |
| miscellaneous                | 0.035        | 0.013        |
| high fibre bread             | 0.023        | -0.050       |
| water                        | 0.023        | -0.043       |
| bread other                  | 0.014        | 0.026        |
| vegetables, raw or boiled    | 0.011        | -0.071       |
| game or offal                | 0.004        | 0.000        |
| other breakfast cereals      | -0.002       | 0.006        |
| crisps and savoury snacks    | -0.004       | 0.007        |
| hot and powdered drinks      | -0.005       | 0.001        |
| eggs                         | -0.012       | 0.059        |
| legumes                      | -0.013       | -0.086       |
| infant nutrition             | -0.019       | -0.022       |
| yogurts                      | -0.020       | -0.074       |
| other fruit                  | -0.022       | -0.040       |
| butters and animal fat       | -0.027       | 0.047        |
| condiments                   | -0.032       | -0.017       |
| low fat milk                 | -0.036       | -0.055       |
| nuts and seeds               | -0.044       | -0.048       |
| potatoes                     | -0.045       | -0.056       |
| fresh fruit                  | -0.048       | -0.172       |
| high fibre breakfast cereals | -0.055       | -0.120       |
| low fibre bread              | -0.059       | -0.005       |
| ice-cream                    | -0.065       | -0.047       |
| margarine and vegetable oils | -0.072       | -0.088       |
| high fat milk and cream      | -0.088       | -0.110       |
| chocolate and confectionery  | -0.096       | -0.067       |
| puddings                     | -0.108       | -0.098       |
| biscuits and cakes           | -0.127       | -0.107       |

Factors loadings  $>0.25$  are indicated in **bold**
